# Supplementary material for: Association of Physical Activity and Exercise with Physical Performance and Muscle Mass in Older Adults: Results from the Longevity Check-Up (Lookup) 7+ Project
Source: MDPI journal article supplement (doi:10.3390/jcm12247521), 2023-12-05
Supplement: s1 [file s1]

**Table S1.** Associations of physical activity habits with physical performance measures and estimated appendicular skeletal muscle mass in male participants ( $n = 1897$ ).

|                          | Univariate $\beta$<br>(95% CI) | Adjusted<br>(95% CI) |                          | Univariate $\beta$<br>(95% CI) | Adjusted<br>(95% CI) |                          | Univariate $\beta$<br>(95% CI) | Adjusted<br>(95% CI) |                         | Univariate $\beta$<br>(95% CI) | Adjusted<br>(95% CI) |
|--------------------------|--------------------------------|----------------------|--------------------------|--------------------------------|----------------------|--------------------------|--------------------------------|----------------------|-------------------------|--------------------------------|----------------------|
| Handgrip strength/BMI    |                                |                      |                          |                                |                      |                          |                                |                      |                         |                                |                      |
| Physically inactive      | 1.00<br>(Reference)            | 1.00<br>(Reference)  | Walking                  | 1.00<br>(Reference)            | 1.00<br>(Reference)  | Running/cycling/swimming | 1.00<br>(Reference)            | 1.00<br>(Reference)  | Strength +/- stretching | 1.00<br>(Reference)            | 1.00<br>(Reference)  |
| Walking                  | 0.07 (0.03, 0.12)              | 0.09 (0.04, 0.13)    | Running/cycling/swimming | 0.09 (0.03, 0.15)              | 0.05 (-0.00, 0.11)   | Walking + exercise       | 0.02 (-0.07, 0.12)             | 0.01 (-0.08, 0.11)   | Walking + exercise      | 0.11 (-0.18, 0.40)             | 0.05 (-0.24, 0.33)   |
| Running/cycling/swimming | 0.16 (0.11, 0.22)              | 0.14 (0.09, 0.18)    | Strength +/- stretching  | 0.01 (-0.17, 0.18)             | -0.02 (-0.18, 0.14)  |                          |                                |                      |                         |                                |                      |
| Strength +/- stretching  | 0.08 (-0.10, 0.26)             | 0.068 (-0.10, 0.24)  | Walking + exercise       | 0.11 (0.03, 0.20)              | 0.16 (0.09, 0.23)    |                          |                                |                      |                         |                                |                      |
| Walking + exercise       | 0.19 (0.11, 0.26)              | 0.16 (0.09, 0.23)    |                          |                                |                      |                          |                                |                      |                         |                                |                      |
| Relative muscle power    |                                |                      |                          |                                |                      |                          |                                |                      |                         |                                |                      |
| Physically inactive      | 1.00<br>(Reference)            | 1.00<br>(Reference)  | Walking                  | 1.00<br>(Reference)            | 1.00<br>(Reference)  | Running/cycling/swimming | 1.00<br>(Reference)            | 1.00<br>(Reference)  | Strength +/- stretching | 1.00<br>(Reference)            | 1.00<br>(Reference)  |
| Walking                  | 0.25 (0.11, 0.38)              | 0.28 (0.15, 0.41)    | Running/cycling/swimming | 0.32 (0.19, 0.52)              | 0.23 (0.04, 0.43)    | Walking + exercise       | 0.03 (-0.24, 0.29)             | 0.02 (-0.24, 0.29)   | Walking + exercise      | -0.08 (-0.73, 0.57)            | -0.07 (-0.70, 0.57)  |
| Running/cycling/swimming | 0.57 (0.41, 0.73)              | 0.50 (0.34, 0.65)    | Strength +/- stretching  | 0.43 (-0.15, 1.00)             | 0.35 (-0.22, 0.91)   |                          |                                |                      |                         |                                |                      |
| Strength +/- stretching  | 0.66 (0.14, 1.21)              | 0.64 (0.13, 1.15)    | Walking + exercise       | 0.38 (0.11, 0.59)              | 0.51 (0.31, 0.71)    |                          |                                |                      |                         |                                |                      |
| Walking + exercise       | 0.594 (0.387, 0.802)           | 0.512 (0.313, 0.710) |                          |                                |                      |                          |                                |                      |                         |                                |                      |
| Allometric muscle power  |                                |                      |                          |                                |                      |                          |                                |                      |                         |                                |                      |
| Physically inactive      | 1.00<br>(Reference)            | 1.00<br>(Reference)  | Walking                  | 1.00<br>(Reference)            | 1.00<br>(Reference)  | Running/cycling/swimming | 1.00<br>(Reference)            | 1.00<br>(Reference)  | Strength +/- stretching | 1.00<br>(Reference)            | 1.00<br>(Reference)  |
| Walking                  | 1.54 (-2.53, 5.63)             | 2.63 (-1.25, 6.51)   | Running/cycling/swimming | 8.47 (2.91, 14.04)             | 5.63 (0.09, 11.13)   | Walking + exercise       | -2.43 (-9.63, 4.77)            | -2.53 (-9.66, 4.60)  | Walking + exercise      | -7.77 (-24.80, 9.26)           | -7.12 (-23.76, 9.52) |
| Running/cycling/swimming | 10.03 (5.33, 14.73)            | 7.74 (3.22, 12.27)   | Strength +/- stretching  | 13.81 (-3.08, 30.70)           | 10.84 (-5.51, 27.18) |                          |                                |                      |                         |                                |                      |
| Strength +/- stretching  | 15.37 (-0.78, 31.51)           | 14.41 (-0.85, 29.68) | Walking + exercise       | 6.04 (-0.82, 12.91)            | 5.04 (-0.78, 10.86)  |                          |                                |                      |                         |                                |                      |
| Walking + exercise       | 7.60 (1.47, 13.73)             | 5.04 (-0.78, 10.86)  |                          |                                |                      |                          |                                |                      |                         |                                |                      |

|                          |                        |                        |                          |                     |                     |                          |                     |                     |                         |                     |                     |
|--------------------------|------------------------|------------------------|--------------------------|---------------------|---------------------|--------------------------|---------------------|---------------------|-------------------------|---------------------|---------------------|
| Specific muscle power    |                        |                        |                          |                     |                     |                          |                     |                     |                         |                     |                     |
| Physically inactive      | 1.00<br>(Reference)    | 1.00<br>(Reference)    | Walking                  | 1.00<br>(Reference) | 1.00<br>(Reference) | Running/cycling/swimming | 1.00<br>(Reference) | 1.00<br>(Reference) | Strength +/- stretching | 1.00<br>(Reference) | 1.00<br>(Reference) |
| Walking                  | 0.28 (-0.25, 0.80)     | 0.39 (-0.11, 0.90)     | Running/cycling/swimming | 1.38 (0.65, 2.10)   | 1.16 (0.42, 1.89)   | Walking + exercise       | -0.24 (-1.25, 0.77) | -0.25 (-1.26, 0.76) | Walking + exercise      | -1.11 (-3.61, 1.38) | -0.90 (-3.38, 1.57) |
| Running/cycling/swimming | 1.65 (1.00, 2.27)      | 1.39 (0.79, 1.99)      | Strength +/- stretching  | 2.25 (0.11, 4.40)   | 1.95 (-0.17, 4.06)  |                          |                     |                     |                         |                     |                     |
| Strength +/- stretching  | 2.53 (0.41, 4.64)      | 2.37 (0.36, 4.37)      | Walking + exercise       | 1.14 (0.24, 2.04)   | 1.11 (0.33, 1.89)   |                          |                     |                     |                         |                     |                     |
| Walking + exercise       | 1.41 (0.60, 2.23)      | 1.11 (0.33, 1.19)      |                          |                     |                     |                          |                     |                     |                         |                     |                     |
| Calf circumference       |                        |                        |                          |                     |                     |                          |                     |                     |                         |                     |                     |
| Physically inactive      | 1.00<br>(Reference)    | 1.00<br>(Reference)    | Walking                  | 1.00<br>(Reference) | 1.00<br>(Reference) | Running/cycling/swimming | 1.00<br>(Reference) | 1.00<br>(Reference) | Strength +/- stretching | 1.00<br>(Reference) | 1.00<br>(Reference) |
| Walking                  | -0.18 (-0.61, 0.26)    | -0.1 (-0.57, 0.29)     | Running/cycling/swimming | 0.06 (-0.48, 0.61)  | -0.20 (-0.74, 0.34) | Walking + exercise       | -0.33 (-1.00, 0.38) | -0.13 (-0.99, 0.36) | Walking + exercise      | 0.41 (-1.50, 2.32)  | 0.18 (-1.66, 2.02)  |
| Running/cycling/swimming | -0.11 (-0.61, 0.38)    | -0.26 (-0.76, 0.24)    | Strength +/- stretching  | -0.67 (-2.39, 1.01) | -0.84 (-2.54, 0.85) |                          |                     |                     |                         |                     |                     |
| Strength +/- stretching  | -0.85 (-2.54, 0.88)    | -0.83 (-2.55, 0.89)    | Walking + exercise       | -0.27 (-0.98, 0.45) | -0.58 (-1.24, 0.08) |                          |                     |                     |                         |                     |                     |
| Walking + exercise       | -0.440 (-1.100, 0.221) | -0.581 (-1.239, 0.076) |                          |                     |                     |                          |                     |                     |                         |                     |                     |
| ASM/BMI                  |                        |                        |                          |                     |                     |                          |                     |                     |                         |                     |                     |
| Physically inactive      | 1.00<br>(Reference)    | 1.00<br>(Reference)    | Walking                  | 1.00<br>(Reference) | 1.00<br>(Reference) | Running/cycling/swimming | 1.00<br>(Reference) | 1.00<br>(Reference) | Strength +/- stretching | 1.00<br>(Reference) | 1.00<br>(Reference) |
| Walking                  | 0.03 (0.02, 0.05)      | 0.04 (0.02, 0.05)      | Running/cycling/swimming | 0.01 (-0.01, 0.03)  | 0.01 (-0.02, 0.03)  | Walking + exercise       | -0.00 (-0.04, 0.03) | -0.01 (-0.04, 0.03) | Walking + exercise      | 0.04 (-0.06, 0.14)  | 0.01 (-0.09, 0.11)  |
| Running/cycling/swimming | 0.05 (0.03, 0.07)      | 0.04 (0.03, 0.06)      | Strength +/- stretching  | -0.03 (-0.10, 0.04) | -0.03 (-0.09, 0.04) |                          |                     |                     |                         |                     |                     |
| Strength +/- stretching  | 0.01 (-0.06, 0.07)     | 0.00 (-0.06, 0.07)     | Walking + exercise       | 0.01 (-0.02, 0.04)  | 0.04 (0.02, 0.07)   |                          |                     |                     |                         |                     |                     |
| Walking + exercise       | 0.04 (0.02, 0.07)      | 0.04 (0.02, 0.07)      |                          |                     |                     |                          |                     |                     |                         |                     |                     |

Models were adjusted for age, smoking habits, and healthy diet. Gray-shadowed cells denote statistical significance. Abbreviations: 5STS, five-time sit-to-stand; ASM, appendicular skeletal muscle mass; BMI, body mass index; CI, confidence interval.

**Table S2.** Associations of physical activity habits with physical performance measures and estimated appendicular skeletal muscle mass in female participants ( $n = 2222$ ).

|                          | Univariate $\beta$<br>(95% CI) | Adjusted<br>(95% CI) |                          | Univariate $\beta$<br>(95% CI) | Adjusted<br>(95% CI) |                          | Univariate $\beta$<br>(95% CI) | Adjusted<br>(95% CI) |                         | Univariate $\beta$<br>(95% CI) | Adjusted<br>(95% CI)  |
|--------------------------|--------------------------------|----------------------|--------------------------|--------------------------------|----------------------|--------------------------|--------------------------------|----------------------|-------------------------|--------------------------------|-----------------------|
| Handgrip strength/BMI    |                                |                      |                          |                                |                      |                          |                                |                      |                         |                                |                       |
| Physically inactive      | 1.00<br>(Reference)            | 1.00<br>(Reference)  |                          | 1.00<br>(Reference)            | 1.00<br>(Reference)  | Running/cycling/swimming | 1.00<br>(Reference)            | 1.00<br>(Reference)  | Strength +/- stretching | 1.00<br>(Reference)            | 1.00<br>(Reference)   |
| Walking                  | 0.05 (0.02, 0.08)              | 0.04 (0.01, 0.07)    | Walking                  | 0.01 (-0.03, 0.059)            | 0.096 (0.046, 0.146) | Walking + exercise       | 0.07 (-0.01, 0.15)             | 0.07 (-0.01, 0.14)   | Walking + exercise      | 0.12 (-0.08, 0.31)             | 0.09 (-0.11, 0.281)   |
| Running/cycling/swimming | 0.07 (0.02, 0.11)              | 0.05 (0.01, 0.09)    | Strength +/- stretching  | 0.10 (-0.02, 0.219)            | 0.06 (-0.08, 0.19)   |                          |                                |                      |                         |                                |                       |
| Strength +/- stretching  | 0.15 (0.02, 0.27)              | 0.15 (0.03, 0.27)    | Walking + exercise       | 0.12 (0.06, 0.18)              | 0.17 (0.10, 0.24)    |                          |                                |                      |                         |                                |                       |
| Walking + exercise       | 0.17 (0.12, 0.23)              | 0.14 (0.09, 0.20)    |                          |                                |                      |                          |                                |                      |                         |                                |                       |
| Relative muscle power    |                                |                      |                          |                                |                      |                          |                                |                      |                         |                                |                       |
| Physically inactive      | 1.00<br>(Reference)            | 1.00<br>(Reference)  |                          | 1.00<br>(Reference)            | 1.00<br>(Reference)  | Running/cycling/swimming | 1.00<br>(Reference)            | 1.00<br>(Reference)  | Strength +/- stretching | 1.00<br>(Reference)            | 1.00<br>(Reference)   |
| Walking                  | 0.31 (0.19, 0.42)              | 0.25 (0.14, 0.36)    | Running/cycling/swimming | 0.28 (0.10, 0.46)              | 0.33 (0.19, 0.46)    | Walking + exercise       | 0.09 (-0.11, 0.30)             | 0.08 (-0.12, 0.28)   | Walking + exercise      | 0.11 (-0.33, 0.54)             | 0.08 (-0.35, 0.51)    |
| Running/cycling/swimming | 0.58 (0.42, 0.75)              | 0.49 (0.33, 0.64)    | Strength +/- stretching  | 0.31 (-0.13, 0.75)             | 0.35 (-0.02, 0.72)   |                          |                                |                      |                         |                                |                       |
| Strength +/- stretching  | 0.61 (0.51, 1.007)             | 0.57 (0.14, 1.000)   | Walking + exercise       | 0.45 (0.23, 0.67)              | 0.41 (0.24, 0.58)    |                          |                                |                      |                         |                                |                       |
| Walking + exercise       | 0.75 (0.51, 0.97)              | 0.62 (0.41, 0.82)    |                          |                                |                      |                          |                                |                      |                         |                                |                       |
| Allometric muscle power  |                                |                      |                          |                                |                      |                          |                                |                      |                         |                                |                       |
| Physically inactive      | 1.00<br>(Reference)            | 1.00<br>(Reference)  |                          | 1.00<br>(Reference)            | 1.00<br>(Reference)  | Running/cycling/swimming | 1.00<br>(Reference)            | 1.00<br>(Reference)  | Strength +/- stretching | 1.00<br>(Reference)            | 1.00<br>(Reference)   |
| Walking                  | 3.02 (0.00, 6.03)              | 1.66 (-1.12, 4.54)   | Running/cycling/swimming | 8.00 (3.16, 12.75)             | 9.46 (5.55, 13.37)   | Walking + exercise       | -0.68 (-6.18, 4.83)            | -9.99 (-6.44, 4.45)  | Walking + exercise      | 0.05 (-11.56, 11.64)           | -0.68 (-12.22, 10.87) |
| Running/cycling/swimming | 10.97 (6.56, 15.39)            | 7.39 (2.68, 12.09)   | Strength +/- stretching  | 6.79 (-5.12, 18.70)            | 9.55 (-1.20, 20.28)  |                          |                                |                      |                         |                                |                       |
| Strength +/- stretching  | 9.80 (-2.73, 22.34)            | 7.45 (-4.28, 19.19)  | Walking + exercise       | 9.40 (3.41, 15.39)             | 8.57 (3.73, 13.42)   |                          |                                |                      |                         |                                |                       |
| Walking + exercise       | 12.41 (6.45, 18.37)            | 8.92 (3.25, 14.55)   |                          |                                |                      |                          |                                |                      |                         |                                |                       |

|                          |                     |                      |                          |                      |                      |                          |                     |                     |                         |                      |                     |
|--------------------------|---------------------|----------------------|--------------------------|----------------------|----------------------|--------------------------|---------------------|---------------------|-------------------------|----------------------|---------------------|
| Specific muscle power    |                     |                      |                          |                      |                      |                          |                     |                     |                         |                      |                     |
| Physically inactive      | 1.00<br>(Reference) | 1.00<br>(Reference)  | Walking                  | 1.00<br>(Reference)  | 1.00<br>(Reference)  | Running/cycling/swimming | 1.00<br>(Reference) | 1.00<br>(Reference) | Strength +/- stretching | 1.00<br>(Reference)  | 1.00<br>(Reference) |
| Walking                  | 0.97 (0.29, 1.65)   | 1.66 (-1.22, 4.54)   | Running/cycling/swimming | 1.56 (0.29, 2.83)    | 0.92 (0.20, 1.65)    | Walking + exercise       | -0.25 (-1.29, 0.79) | -0.31 (-1.35, 0.73) | Walking + exercise      | -0.93 (-2.87, 1.001) | -0.93 (-2.83, 0.97) |
| Running/cycling/swimming | 2.53 (1.52, 3.54)   | 8.59 (4.41, 12.77)   | Strength +/- stretching  | 1.44 (-1.48, 4.36)   | 1.75 (-0.12, 3.63)   |                          |                     |                     |                         |                      |                     |
| Strength +/- stretching  | 2.41 (-0.32, 5.15)  | 8.81 (-2.99, 20.62)  | Walking + exercise       | 1.34 (-0.10, 2.79)   | -0.58 (-0.26, 1.43)  |                          |                     |                     |                         |                      |                     |
| Walking + exercise       | 2.32 (1.002, 3.32)  | 1.77 (0.48, 3.06)    |                          |                      |                      |                          |                     |                     |                         |                      |                     |
| Calf circumference       |                     |                      |                          |                      |                      |                          |                     |                     |                         |                      |                     |
| Physically inactive      | 1.00<br>(Reference) | 1.00<br>(Reference)  | Walking                  | 1.00<br>(Reference)  | 1.00<br>(Reference)  | Running/cycling/swimming | 1.00<br>(Reference) | 1.00<br>(Reference) | Strength +/- stretching | 1.00<br>(Reference)  | 1.00<br>(Reference) |
| Walking                  | -0.26 (-0.67, 0.16) | -0.32 (-0.73, 0.10)  | Running/cycling/swimming | -0.01 (-0.60, 0.58)  | 0.14 (-0.28, 0.56)   | Walking + exercise       | -0.04 (-0.60, 0.51) | -0.05 (-0.59, 0.49) | Walking + exercise      | 0.475 (-0.80, 1.79)  | 0.21 (-1.001, 1.44) |
| Running/cycling/swimming | -0.27 (-0.85, 0.32) | -0.38 (-0.97, 0.20)  | Strength +/- stretching  | -0.03 (-1.63, 1.569) | -0.32 (-1.54, 0.896) |                          |                     |                     |                         |                      |                     |
| Strength +/- stretching  | -0.29 (-2.04, 1.47) | -0.33 (-2.07, 1.41)  | Walking + exercise       | 0.20 (-0.59, 0.99)   | 0.09 (-0.45, 0.64)   |                          |                     |                     |                         |                      |                     |
| Walking + exercise       | -0.06 (-0.88, 0.77) | -0.19 (-1.002, 0.64) |                          |                      |                      |                          |                     |                     |                         |                      |                     |
| ASM/BMI                  |                     |                      |                          |                      |                      |                          |                     |                     |                         |                      |                     |
| Physically inactive      | 1.00<br>(Reference) | 1.00<br>(Reference)  | Walking                  | 1.00<br>(Reference)  | 1.00<br>(Reference)  | Running/cycling/swimming | 1.00<br>(Reference) | 1.00<br>(Reference) | Strength +/- stretching | 1.00<br>(Reference)  | 1.00<br>(Reference) |
| Walking                  | 0.03 (0.01, 0.04)   | 0.02 (0.01, 0.03)    | Running/cycling/swimming | -0.00 (-0.02, 0.02)  | 0.04 (0.01, 0.06)    | Walking + exercise       | 0.02 (-0.02, 0.05)  | 0.02 (-0.02, 0.05)  | Walking + exercise      | 0.06 (-0.02, 0.14)   | 0.05 (-0.03, 0.13)  |
| Running/cycling/swimming | 0.02 (0.01, 0.04)   | -0.00 (-0.02, 0.02)  | Strength +/- stretching  | 0.01 (-0.04, 0.06)   | -0.01 (-0.08, 0.06)  |                          |                     |                     |                         |                      |                     |
| Strength +/- stretching  | 0.03 (-0.02, 0.08)  | 0.01 (-0.04, 0.06)   | Walking + exercise       | 0.02 (-0.01, 0.04)   | 0.06 (0.03, 0.09)    |                          |                     |                     |                         |                      |                     |
| Walking + exercise       | 0.04 (0.02, 0.07)   | 0.04 (0.01, 0.09)    |                          |                      |                      |                          |                     |                     |                         |                      |                     |

Models were adjusted for age, smoking habits, and healthy diet. Gray-shadowed cells denote statistical significance. Abbreviations: 5STS, five-time sit-to-stand; ASM, appendicular skeletal muscle mass; BMI, body mass index; CI, confidence interval.
